# Supplementary material for: Simulated Long-term Evolution of the Thermosphere during the Holocene: 1. Neutral Density and Temperature
Source: Copernicus journal article supplement (doi:10.5194/egusphere-2023-233), 2023-02-14
Supplement: Supplementary file [file egusphere-2023-233-AC2-supplement.pdf]

**Reply on RC2:**

*This work (Simulated Long-term Evolution of the Thermosphere during the Holocene: 1. Neutral Density and Temperature) presents new and interesting results regarding the paleo-thermosphere, linked to a previous work of the authors (Simulated Long -Term Evolution of the Ionosphere During the Holocene). The research on long-term trends, as this one which considers in particular the Earth's magnetic field , the CO2 concentration increase, and solar activity variation as possible sources, are always welcome in the community that studies climate change and trends throughout the atmosphere.*

*I consider that this work can be accepted for publication after minor revisions.*

Thank you for your recognition of our work. Your comments make our articles clearer and easier to understand. We are very grateful for your detailed comments. We have made minor revision to the manuscript accordingly.

**Main Comments:**

*(1) The thermosphere variation (temperature and density in this case) which responds to solar activity variation has a timescale of 10 to 11 years, while the variations linked to CO2 increase and/or Earth's magnetic field variation have a timescale of around 100 years. If you consider solar activity variation of the same timescale you have for example, the Gleissberg cycle, whose amplitude is much much weaker than the quasi- decadal variation.*

*I think that this is the change in solar activity which would be interesting to compare with the variations linked to CO2 and the geomagnetic field variations. Since at these time scales I am quite sure they will be all comparable. You have even the Suess-cycle in solar activity to consider also.*

*I consider that the 80% variation in the thermosphere due to the solar activity quasi-decadal cycle is already well known and also that it is a dominant variability in the case of inter-annual variability.*

*Anyway I consider also important the comparison of all the forcings analyzed by the authors, even with the solar activity timescale of variation much different than that of the other forcings.*

Thanks for your comment. The characteristic time scales of the Gleissberg cycle and the Suess cycle are from 60 to 150 years and from 180 to 250 years, respectively. Therefore, we average our decadal resolution results over 100 and 200 years to obtain the effect of these two cycles on the thermosphere, as shown in the following Figure 1. We can find that the neutral density oscillation is no longer as dramatic as in Figure 3c in our manuscript and is mostly within  $\pm 40\%$ , especially in the Suess cycle effect. This is also reflected in the change of neutral temperature in the following Figure 1. However, these features are still mainly controlled by solar activity and are stronger than the effect of CO<sub>2</sub> and the geomagnetic field. Therefore, we have not included this information in the revised manuscript. But we still appreciate your comment, which has made us learn a lot.

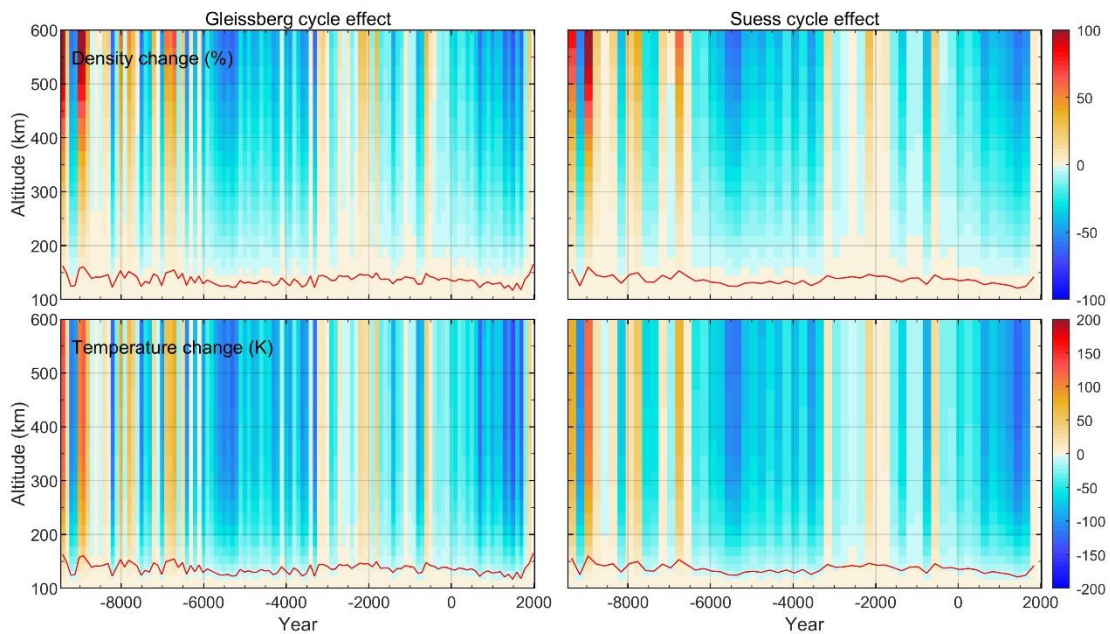

Figure 1. The effects of (left column) Gleissberg cycle and (right column) Suess cycle on neutral (top row) density and (bottom row) temperature. The red line is the relative change in the 100- or 200-year average of the F10.7 index.

*(2) In figures 3 and 4 it is evident that in the last 2000 years the density and temperature variations due to Earth's magnetic field in the magnetic pole regions are opposite. In a pure dipolar field this should not happen, so I guess this is due to the multipolar components of the field (see for example Zossi et al. (2020). Geomagnetic field model indicates shrinking northern auroral oval. Journal of Geophysical Research: Space Physics, 125, e2019JA027434. <https://doi.org/10.1029/2019JA027434>). This is reasonable since as time passes, and the dipolar component decreases, the Earth's field is less and less dipolar. So the symmetry between northern and southern hemisphere should also decrease.*

*Could the opposite behavior along the last ~2000 years, or so, be related in your case also to the radial component of the field which, due to the multipolar components for example, is increasing in the northern hemisphere and decreasing in the south ?*

*Although, I think that this should lead to lower temperature in the northern pole and higher at the south. Which is opposite to your results.*

*Maybe I am wrong with this reasoning, but if not, I would like the author to comment on this possibility.*

Thanks for your comments. In our other work (Simulated Long-term Evolution of the Thermosphere during the Holocene: 2. Circulation and Solar Tides, <https://doi.org/10.5194/egusphere-2023-234>), Figure 5 (also Figure 2 below) shows that the non-dipole component of the magnetic field is responsible for the asymmetry of the thermospheric variations between the northern and southern hemispheres. The southern magnetic pole has drifted very little in the last 70 years, so the lower dipole moment leads to an increase in temperature near the southern magnetic pole, which is consistent with your reasoning, but Figures 3 and 4 in our manuscript show the zonal mean for all longitudes and UTs, so it is shown as a decrease in temperature at high latitudes of the southern hemisphere. On the other hand, the long drift distance of the northern magnetic pole leads to a more complex thermospheric variation at high latitudes in the northern hemisphere, which is caused by a combination of magnetic pole drift, neutral wind changes, decreased dipole moment, and increased particle precipitation during the shrinking of the aurora oval.

Overall, your reasoning is very reasonable, and the results of our zonal mean are also reasonable, and we have added some sentences in the revised manuscript to reveal this point, see lines 179–184.

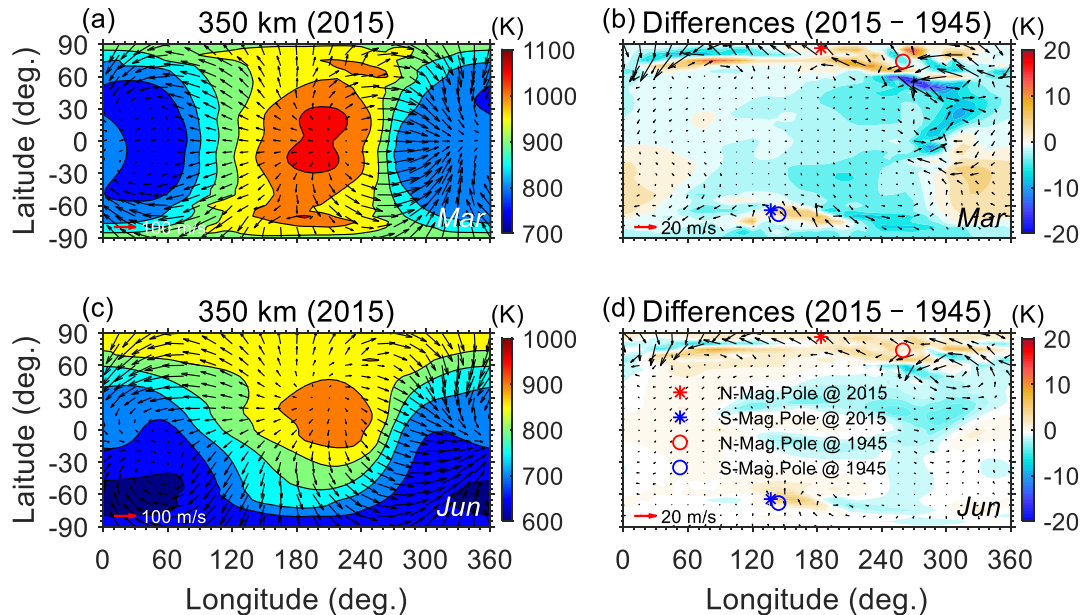

Figure 2. Geographic distribution of neutral temperature (color contours,) and horizontal winds (black arrows) at 350 km in the (a) March and (c) June at UT00. (b) Differences in neutral temperature and horizontal winds are caused by the changes of geomagnetic fields between 1945 and 2015. The scales of wind velocity are labeled in the bottom-left corner of each plot. The changes of magnetic north and south poles between 1945 and 2015 are illustrated in plots (b) and (d).

**(3) In Figure 8, why are there differences between the two panels? Is the panel which shows the variability with UT for a fixed longitude or a zonal mean?**

In Figure 8, panels (a) and (c) show the variability of the zonal mean with latitude and UT, and panels (b) and (f) show the variability of the UT mean with latitude and longitude.

**Minor comments:**

**(1) In line 49: "A et al., 2012" is may be "Ridley et al., 2012) ?? But I am not sure. Please check.**

The author is "Ercha A" and the last name is "A". The reference information is "A, E., Ridley, A. J., Zhang, D., and Xiao, Z.: Analyzing the hemispheric asymmetry in the thermospheric density response to geomagnetic storms, *J. Geophys. Res.: Space Phys.*, 117, A08317, <https://doi.org/10.1029/2011ja017259>, 2012."

**(2) Line 259: " Only the effect of the geomagnetic field is strongly dependent on the universal time and geographical location, and the weakening of the dipole moment leading to an increase in Joule heating in the polar region thus make the thermosphere change more than the effect of CO2. Overall, the higher altitude, the larger the effect of the three drivers on the neutral density and temperature."**

**After the word more, in my opinion it lacks a word. For example "more intense" or "stronger".**

**In the second sentence I would write: " Overall, the higher the altitude, ..."**

Your comments are useful to us and we have made revisions accordingly.
